# Supplementary material for: Antimuscarinic Discontinuation in Patients with Overactive Bladder in Nursing Homes: A Retrospective Study of Medicare Beneficiaries
Source: Springer Nature journal article supplement (doi:10.1007/s12325-020-01412-z), 2020-07-07
Supplement: MOESM1 [file 18154964]

**Supplementary Table 1: OAB-specific medications to identify individuals managed for OAB**

| **Brand name (generic name)** |
| --- |
| **Enablex (darifenacin)** |
| **Toviaz (fesoterodine)** |
| **Oxytrol (oxybutynin)** |
| **Gelnique (oxybutynin)** |
| **Gelnique (oxybutynin chloride)** |
| **Ditropan (IR) (oxybutynin chloride)** |
| **Ditropan (XL) (oxybutynin chloride)** |
| **VESIcare (solifenacin)** |
| **Detrol (IR) (tolterodine)** |
| **Detrol (LA) (tolterodine)** |
| **Sanctura** |
| **Sanctura XR (trospium chloride)** |
| **Myrbetriq (mirabegron)** |
| **Botox (onabotulinumtoxinA)** |

Abbreviations: IR = immediate release; XL = extended release; LA = long acting; XR = extended release
